# Supplementary material
Source: PubMed Central journal article supplement (PMC7596896)
Supplement: NIHMS1622118-supplement-1622118_SuppTables.pdf [file NIHMS1622118-supplement-1622118_SuppTables.pdf]

### Supplementary Table 1. Distribution of psychiatric diagnoses in the sample

Number of individuals among CUD cases and the control group having a diagnosis of one or more of five major psychiatric disorders studied in iPSYCH.

| Disorder                                       | CUD cases | % of cases | controls | % controls |
|------------------------------------------------|-----------|------------|----------|------------|
| Schizophrenia                                  | 569       | 23.84      | 1,789    | 3.65       |
| Bipolar disorder                               | 188       | 7.88       | 1,176    | 2.40       |
| Autism spectrum disorder                       | 153       | 6.41       | 8,698    | 17.76      |
| Attention deficit hyperactivity disorder       | 926       | 38.79      | 9,701    | 19.80      |
| Major depression disorder                      | 1,134     | 47.51      | 16,393   | 33.47      |
| Individuals without any of the above disorders | 97        | 4.06       | 16,269   | 33.21      |

Note: numbers are after QC (genetic outliers and related individuals are excluded) numbers does not represent unique individuals, meaning that individuals could count more than once if diagnosed with more than one psychiatric disorder in combination with CUD.

### Supplementary Table 2. Distribution of CUD cases across CUD diagnosis sub-categories

| Sub-categories | Number of cases within diagnostic sub-categories | Number of cases having only the specific sub-diagnosis |
|----------------|--------------------------------------------------|--------------------------------------------------------|
| F12.1          | 877                                              | 500                                                    |
| F12.2          | 1633                                             | 1139                                                   |
| F12.5          | 341                                              | 114                                                    |
| F12.7          | 25                                               | 6                                                      |
| F12.8          | 36                                               | 15                                                     |
| F12.9          | 115                                              | 51                                                     |

Note: numbers are after QC (genetic outliers and related individuals are excluded)

**Supplementary Table 3. Distribution of individuals with psychiatric disorders over CUD diagnostic sub-categories**

Distribution of comorbid psychiatric disorders (schizophrenia (SZ), bipolar disorder (BD), autism spectrum disorder (ASD), attention-deficit/hyperactivity disorder (ADHD), major depressive disorder (MDD)) among CUD cases across CUD diagnostic sub-categories. The counts across subcategories for individuals without a psychiatric disorder is given as well (CO). For each category counts of individuals are listed and the percentage of the counts in relation to the total N of each comorbid psychiatric disorder.

|                | CUD+SZ     | % CUD+SZ | CUD+BD     | % CUD+BD | CUD+ASD    | % CUD+ASD | CUD+ADHD   | % CUD+ADHD | CUD+MDD     | % CUD+MDD | CUD+CO    | % CUD+CO | All cases   | % Cases |
|----------------|------------|----------|------------|----------|------------|-----------|------------|------------|-------------|-----------|-----------|----------|-------------|---------|
| <b>Total N</b> | <b>569</b> |          | <b>188</b> |          | <b>153</b> |           | <b>926</b> |            | <b>1134</b> |           | <b>97</b> |          | <b>2387</b> |         |
| F12.1          | 229        | 40.246   | 85         | 45.213   | 53         | 34.641    | 302        | 32.613     | 440         | 38.801    | 31        | 31.959   | 877         | 36.741  |
| F12.2          | 409        | 71.880   | 129        | 68.617   | 106        | 69.281    | 682        | 73.650     | 759         | 66.931    | 60        | 61.856   | 1633        | 68.412  |
| F12.5          | 169        | 29.701   | 37         | 19.681   | 18         | 11.765    | 99         | 10.691     | 137         | 12.081    | 13        | 13.402   | 341         | 14.286  |
| F12.7          | 7          | 1.230    | 2          | 1.064    | 1          | 0.654     | 11         | 1.188      | 11          | 0.970     | 1         | 1.031    | 25          | 1.047   |
| F12.8          | 11         | 1.933    | 5          | 2.660    | 2          | 1.307     | 12         | 1.296      | 18          | 1.587     | 2         | 2.062    | 36          | 1.508   |
| F12.9          | 28         | 4.921    | 10         | 5.319    | 9          | 5.882     | 39         | 4.212      | 63          | 5.556     | 2         | 2.062    | 115         | 4.818   |

**Note** the numbers are counts of individuals (after QC) in each diagnosis sub-category having CUD and a psychiatric diagnosis or no psychiatric diagnosis. Individuals might occur in more than one category if they have more than one CUD diagnosis and/or more than one psychiatric diagnosis.

**Supplementary Table 4. CUD polygenic risk score analysis in deCODE samples**

Association of CUD polygenic risk scores in deCODE samples with CUD (2,257 cases and 145,069 controls), schizophrenia (SCZ, 729 cases and 153,007 controls) and bipolar disorder (BD, 1,751 cases and 151,923 controls). PRS was estimated using the iPSYCH CUD GWAS as discovery (2,387 individuals with CUD and 48,985 controls) using different P-value thresholds in the discovery GWAS (Threshold). The effect is given in odds ratio per standard deviation PRS (Effect) and the variance explained by Nagelkerke's  $R^2$  is given in percentages (Rsq(%)). Two-sided P-values (Pval) are from linear regression. Values in bold represents significance after Bonferroni correction (P=0.003).

| Training GWAS     | Threshold   | Phenotype, deCODE | Pval                          | Effect*      | Rsq(%)       |
|-------------------|-------------|-------------------|-------------------------------|--------------|--------------|
| <b>CUD iPSYCH</b> | <b>0.01</b> | <b>CUD</b>        | <b>2.17x10<sup>-09</sup></b>  | <b>1.173</b> | <b>0.253</b> |
| CUD iPSYCH        | 0.01        | SCZ               | 7.01 x10 <sup>-02</sup>       | 1.084        | 0.053        |
| CUD iPSYCH        | 0.01        | BD                | 1.18 x10 <sup>-01</sup>       | 1.044        | 0.018        |
| <b>CUD iPSYCH</b> | <b>0.03</b> | <b>CUD</b>        | <b>3.03 x10<sup>-09</sup></b> | <b>1.172</b> | <b>0.249</b> |
| CUD iPSYCH        | 0.03        | SCZ               | 1.16 x10 <sup>-01</sup>       | 1.073        | 0.040        |
| CUD iPSYCH        | 0.03        | BD                | 1.08 x10 <sup>-01</sup>       | 1.046        | 0.019        |
| <b>CUD iPSYCH</b> | <b>0.1</b>  | <b>CUD</b>        | <b>3.57 x10<sup>-09</sup></b> | <b>1.171</b> | <b>0.246</b> |
| CUD iPSYCH        | 0.1         | SCZ               | 1.36 x10 <sup>-01</sup>       | 1.069        | 0.036        |
| CUD iPSYCH        | 0.1         | BD                | 1.04 x10 <sup>-01</sup>       | 1.046        | 0.020        |
| <b>CUD iPSYCH</b> | <b>0.3</b>  | <b>CUD</b>        | <b>3.71 x10<sup>-09</sup></b> | <b>1.171</b> | <b>0.246</b> |
| CUD iPSYCH        | 0.3         | SCZ               | 1.40 x10 <sup>-01</sup>       | 1.068        | 0.035        |
| CUD iPSYCH        | 0.3         | BD                | 1.02 x10 <sup>-01</sup>       | 1.046        | 0.020        |
| <b>CUD iPSYCH</b> | <b>1</b>    | <b>CUD</b>        | <b>3.84 x10<sup>-09</sup></b> | <b>1.171</b> | <b>0.245</b> |
| CUD iPSYCH        | 1           | SCZ               | 1.43 x10 <sup>-01</sup>       | 1.068        | 0.034        |
| CUD iPSYCH        | 1           | BD                | 1.02 x10 <sup>-01</sup>       | 1.046        | 0.020        |

**Supplementary Table 5. Association of previously identified cannabis risk variants**

Association two-sided P-values (P-value) from logistic regression and odds ratio (OR) with respect to affect allele (A1) in the present study (2,387 individuals with CUD and 48,985 controls) of index variants passing the threshold for genome-wide significance ( $P=5 \times 10^{-8}$ ) in previous GWAS studies of cannabis related phenotypes.

| <b>Variant</b> | <b>Phenotype<br/>(previous GWAS)</b>                | <b>Previous<br/>GWAS</b>    | <b>Sample size<br/>(Previous GWAS)</b> | <b>A1<br/>(current study)</b> | <b>OR<br/>(current study)</b> | <b>P-value<br/>(current study)</b> |
|----------------|-----------------------------------------------------|-----------------------------|----------------------------------------|-------------------------------|-------------------------------|------------------------------------|
| rs143244591    | Cannabis criterion count                            | Sherva et al. <sup>1</sup>  | 3,394 cases<br>12,861 controls         | NA                            | NA (MAF < 0.01 in Europeans)  | NA                                 |
| rs77378271     | Cannabis criterion count                            | Sherva et al. <sup>1</sup>  | 3,394 cases<br>12,861 controls         | A                             | 0.96                          | 0.46                               |
| rs146091982    | Cannabis criterion count                            | Sherva et al. <sup>1</sup>  | 3,394 cases<br>12,861 controls         | NA                            | NA (monomorphic in Europeans) | NA                                 |
| rs1409568      | Cannabis dependence vs<br>cannabis exposed controls | Agrawal et al. <sup>2</sup> | 2,080 cases<br>6435 controls           | T                             | 0.97                          | 0.72                               |
| rs2875907      | Lifetime cannabis use                               | Pasman et al. <sup>3</sup>  | 184,765 (22-43% users)                 | A                             | 1.05                          | 0.11                               |
| rs1448602      | Lifetime cannabis use                               | Pasman et al. <sup>3</sup>  | 184,765 (22-43% users)                 | A                             | 0.98                          | 0.49                               |
| rs7651996      | Lifetime cannabis use                               | Pasman et al. <sup>3</sup>  | 184,765 (22-43% users)                 | T                             | 1.05                          | 0.16                               |
| rs10085617     | Lifetime cannabis use                               | Pasman et al. <sup>3</sup>  | 184,765 (22-43% users)                 | A                             | 1.00                          | 0.95                               |
| rs9773390      | Lifetime cannabis use                               | Pasman et al. <sup>3</sup>  | 184,765 (22-43% users)                 | T                             | 1.06                          | 0.31                               |
| rs9919557      | Lifetime cannabis use                               | Pasman et al. <sup>3</sup>  | 184,765 (22-43% users)                 | T                             | 0.96                          | 0.17                               |
| rs10499        | Lifetime cannabis use                               | Pasman et al. <sup>3</sup>  | 184,765 (22-43% users)                 | A                             | 1.02                          | 0.51                               |
| rs17761723     | Lifetime cannabis use                               | Pasman et al. <sup>3</sup>  | 184,765 (22-43% users)                 | T                             | 1.01                          | 0.80                               |

NA = information not available

**Supplementary Table 6. Tissues and number of genes tested using PrediXcan**

Overview of tissues and number of genes included in the analysis of imputed genetically regulated expression using PrediXcan<sup>4</sup>. The analysis is based on 2,387 individuals with CUD and 48,985 controls, two sided P-value from logistic regression. Result in bold is significant after correction for multiple testing ( $P=3.8 \times 10^{-6}$ ).

| <b>Tissue</b>                   | <b>Number of genes tested</b> | <b>Direction of expression in cases compared to controls (Beta)</b> | <b>P-value for association of <i>CHRNA2</i> imputed expression with cannabis use disorder</b> |
|---------------------------------|-------------------------------|---------------------------------------------------------------------|-----------------------------------------------------------------------------------------------|
| Dorsolateral prefrontal cortex  | 10,929                        | -1.210                                                              | $5.912 \times 10^{-4}$ (SE = 0.35)                                                            |
| Anterior cingulate cortex       | 2,658                         |                                                                     | NA                                                                                            |
| Caudate basal ganglia           | 3,620                         |                                                                     | NA                                                                                            |
| Cerebellar Hemisphere           | 4,234                         | -0.121                                                              | $5.304 \times 10^{-3}$ (SE = 0.04)                                                            |
| <b>Cerebellum</b>               | <b>4,836</b>                  | <b>-0.210</b>                                                       | <b><math>2.713 \times 10^{-6}</math> (SE = 0.05)</b>                                          |
| Cortex                          | 3,586                         |                                                                     | NA                                                                                            |
| Frontal cortex                  | 3,212                         |                                                                     | NA                                                                                            |
| Hippocampus                     | 2,537                         |                                                                     | NA                                                                                            |
| Hypothalamus                    | 2,459                         |                                                                     | NA                                                                                            |
| Nucleus accumbens basal ganglia | 3,133                         |                                                                     | NA                                                                                            |
| Putamen basal ganglia           | 2,810                         |                                                                     | NA                                                                                            |

NA = results not available, due to no valid model for gene expression in the tissue.

### Supplementary Table 7. Association of cannabis risk locus with smoking behaviour

Association of the risk locus for cannabis use disorder in the large GWAS meta-analyses of smoking behaviour in 1.2 mill people performed by Liu et al<sup>5</sup>. Index SNPs from the meta-analysis located in the risk locus (LD region of the CUD risk variant rs56372821) are shown. Regression beta (Beta) for the effect of the risk allele is given, together with the association P-value (P) and standard error (SE) and LD with the CUD risk variant rs56372821 (R<sup>2</sup>). Two side P-values from logistic regression (Smoking cessation and smoking initiation) and linear regression (cigarettes per day and age at smoking initiation).

| Phenotype                 | Sample size | Variant    | Ref allele | Risk allele | Pvalue                 | Beta   | SE    | N         | R <sup>2</sup> |
|---------------------------|-------------|------------|------------|-------------|------------------------|--------|-------|-----------|----------------|
| Age at smoking initiation | 341,427     | rs11780471 | G          | A           | 9.44x10 <sup>-11</sup> | 0.033  | 0.005 | 341,427   | 0.288          |
| Cigarettes per day        | 335,394     | rs73229090 | C          | A           | 8.09x10 <sup>-09</sup> | 0.016  | 0.003 | 337,334   | 0.701          |
| Smoking cessation         | 547,219     | rs1565735  | T          | A           | 1.54x10 <sup>-12</sup> | -0.035 | 0.005 | 547,219   | 0.727          |
| Smoking initiation        | 1,232,091   | rs11783093 | C          | T           | 2.07x10 <sup>-41</sup> | -0.047 | 0.003 | 1,232,091 | 1.000          |

**Supplementary Table 8. mtCOJO results for the CUD risk locus**

Results from mtCOJO analysis<sup>6</sup>, which adjust the association P-values from the CUD GWAS for the potential confounding of smoking by using smoking associated SNPs from GWAS of smoking initiation<sup>5</sup>. P-value thresholds for inclusion of variants from smoking GWAS (P-thres) are given together with the number of variants used for the estimation of the effect of smoking on the risk of CUD (N-snps). The original two-sided CUD GWAS P-values (P) and OR (OR) and corrected OR (OR\_corrected) and two-sided P-values (P\_corrected) are presented. The results for the CUD index variant (rs56372821) and the smoking initiation index variant (rs11783093) are shown.

| SNP        | P-thres            | N-snps | A1 | A2 | OR    | P                        | OR_corrected | P_corrected             |
|------------|--------------------|--------|----|----|-------|--------------------------|--------------|-------------------------|
| rs56372821 | 5x10 <sup>-8</sup> | 61     | A  | G  | 0.728 | 9.3059x10 <sup>-12</sup> | 0.759        | 4.443x10 <sup>-09</sup> |
| rs11783093 | 5x10 <sup>-8</sup> | 61     | T  | C  | 0.728 | 1.089x10 <sup>-11</sup>  | 0.759        | 4.494x10 <sup>-09</sup> |

**Supplementary Table 9. Distribution of individuals with respect to rs56372821 genotypes**

In the table below individuals having one or two minor alleles of rs56372821 are grouped together within each unique phenotype (schizophrenia (SZ), bipolar disorder (BP), autism spectrum disorder (ASD), attention deficit hyper activity disorder (ADHD), major depressive disorder (MDD), controls (ICON)), and the number of individuals with a comorbid CUD diagnosis among each group in parentheses. Furthermore, the table has the maximum likelihood estimates of the proportion  $\pi_1$  of CUD within carriers of one or two minor alleles, and the proportion  $\pi_2$  of CUD within carriers of two major alleles, assuming the worst-case scenario of an expected odds ratio 0.954.

|                           | SZ (CUD)   | BP (CUD)  | ASD (CUD)  | ADHD (CUD) | MDD (CUD)  | ICON (CUD) |
|---------------------------|------------|-----------|------------|------------|------------|------------|
| At least one minor allele | 624 (128)  | 356 (32)  | 2476 (25)  | 2466 (185) | 4182 (153) | 4792 (24)  |
| major allele              | 1715 (440) | 902 (128) | 6066 (103) | 6064 (533) | 9858 (529) | 11394 (71) |
| $\pi_1$                   | 0.23653    | 0.12347   | 0.01450    | 0.08161    | 0.04706    | 0.00568    |
| $\pi_2$                   | 0.24514    | 0.12865   | 0.01518    | 0.08521    | 0.04922    | 0.00595    |

### Supplementary Table 10. CUD polygenic risk score analysis of smoking in deCODE

Association (two-sided P-value from linear regression) of CUD polygenic risk scores in deCODE samples with CUD and tobacco smoking (EverSmoker). PRS was estimated using the iPSYCH CUD GWAS as discovery using a P-value threshold of  $P=0.01$  in the discovery GWAS. The effect is given in odds ratio per standard deviation PRS (OR) and the variance explained by Nagelkerke's  $R^2$  (in percentages) is reported on the observed scale ( $R^2_{\text{observed}}$ ) and on the liability ( $R^2_{\text{liability}}$ ) scale using the conversion recommended by Lee et al.<sup>7</sup>

| PRS | Pheno      | Cases  | Controls | $R^2_{\text{observed}}$ (%) | $R^2_{\text{liability}}$ (%) | OR    | SE    | P-value                 |
|-----|------------|--------|----------|-----------------------------|------------------------------|-------|-------|-------------------------|
| CUD | CUD        | 2,257  | 145,069  | 0.246                       | 0.337*                       | 1.167 | 0.026 | 2.613x10 <sup>-09</sup> |
| CUD | EverSmoker | 46,941 | 20,602   | 0.104                       | 0.107*                       | 1.066 | 0.010 | 9.320x10 <sup>-10</sup> |

\*In the conversion to  $R^2$  on the liability scale a prevalence of 0.01 was used for CUD and 0.17 for smoking.



## Supplementary Table 11. Polygenic risk score analysis

Results from PRS analysis in CUD for phenotypes related to cognition, personality, psychiatric disorders, reproduction and smoking behavior. Association P-value of PRS with CUD (P-value). The P-value threshold in the discovery GWAS (P-value threshold), the Z-score from logistic regression (Z-score) and Nagelkerke's  $R^2$  ( $R^2$ ) as estimate of the percentage of the variance in the phenotype explained by PRS. Nagelkerke's  $R^2$  on the liability ( $R^2_{liability}$ ) scale estimated using the conversion recommended by Lee et al.<sup>7</sup> Two-sided P-values from logistic regression. Values in bold represents significance after Bonferroni correction.

| Phenotype/GWAS study                                              | Trait type          | Sample size | Z score | P-value                      | $R^2$                 | $R^2_{liability}$     | Threshold           |
|-------------------------------------------------------------------|---------------------|-------------|---------|------------------------------|-----------------------|-----------------------|---------------------|
| Attainment of college/university degree (UK Biobank) <sup>8</sup> | Cognition/education | 111,114     | -2.81   | 4.94x 10 <sup>-03</sup>      | 4.6x10 <sup>-04</sup> | 4.5x10 <sup>-04</sup> | 0.5                 |
| Memory (UK Biobank) <sup>8</sup>                                  | Cognition/education | 112,067     | 1.23    | 2.18x10 <sup>-01</sup>       | 8.9x10 <sup>-05</sup> | 8.7x10 <sup>-05</sup> | 1x10 <sup>-03</sup> |
| Reaction time (UK Biobank) <sup>8</sup>                           | Cognition/education | 111,483     | 1.96    | 5.00x10 <sup>-02</sup>       | 2.2x10 <sup>-04</sup> | 2.1x10 <sup>-04</sup> | 0.1                 |
| verbal-numerical reasoning (UK Biobank) <sup>8</sup>              | Cognition/education | 36,035      | 1.43    | 1.53x10 <sup>-01</sup>       | 1.2x10 <sup>-04</sup> | 1.2x10 <sup>-04</sup> | 0.2                 |
| Human Intelligence <sup>9</sup>                                   | Cognition/education | 78,308      | -3.51   | <b>4.33x10<sup>-04</sup></b> | 7.2x10 <sup>-04</sup> | 7.0x10 <sup>-04</sup> | 0.5                 |
| Number of educational years (SSGAC) <sup>10</sup>                 | Cognition/education | 328,917     | -7.78   | <b>7.44x10<sup>-15</sup></b> | 3.5x10 <sup>-03</sup> | 3.4x10 <sup>-03</sup> | 5x10 <sup>-02</sup> |
| College completion (SSGAC) <sup>11</sup>                          | Cognition/education | 126,559     | -5.10   | <b>3.33x10<sup>-07</sup></b> | 1.5x10 <sup>-03</sup> | 1.5x10 <sup>-03</sup> | 1x10 <sup>-02</sup> |
| Openness (GPC-1) <sup>12</sup>                                    | Personality         | 17,375      | 1.47    | 1.43x10 <sup>-01</sup>       | 1.3x10 <sup>-04</sup> | 1.3x10 <sup>-04</sup> | 1x10 <sup>-04</sup> |
| Neuroticism (GPC-2) <sup>13</sup>                                 | Personality         | 63,661      | -1.95   | 5.02x10 <sup>-02</sup>       | 2.2x10 <sup>-04</sup> | 2.1x10 <sup>-04</sup> | 1x10 <sup>-03</sup> |
| Extraversion (GPC-2) <sup>14</sup>                                | Personality         | 63,030      | -0.52   | 6.03x10 <sup>-01</sup>       | 1.6x10 <sup>-05</sup> | 1.6x10 <sup>-05</sup> | 1x10 <sup>-04</sup> |
| Agreeableness (GPC-1) <sup>12</sup>                               | Personality         | 17,375      | -1.73   | 8.23x10 <sup>-02</sup>       | 1.8x10 <sup>-04</sup> | 1.8x10 <sup>-04</sup> | 1x10 <sup>-02</sup> |
| Conscientiousness (GPC-1) <sup>12</sup>                           | Personality         | 17,375      | -2.08   | 3.74x10 <sup>-02</sup>       | 2.5x10 <sup>-04</sup> | 2.4x10 <sup>-04</sup> | 1x10 <sup>-04</sup> |
| ADHD (iPSYCH+PGC) <sup>15</sup>                                   | Psychiatric*        | 53,293      | 5.10    | <b>3.45x10<sup>-07</sup></b> | 2.3x10 <sup>-03</sup> | 2.3x10 <sup>-03</sup> | 0.5                 |
| Schizophrenia (PGC) <sup>16</sup>                                 | Psychiatric*        | 150,064     | 5.47    | <b>4.45x10<sup>-08</sup></b> | 2.2x10 <sup>-03</sup> | 2.3x10 <sup>-03</sup> | 0.5                 |
| Major depressive disorder (PGC) <sup>17</sup>                     | Psychiatric*        | 18,759      | -0.55   | 5.81x10 <sup>-01</sup>       | 3.1x10 <sup>-05</sup> | 3.0x10 <sup>-05</sup> | 1x10 <sup>-03</sup> |
| Depressive symptoms (SSGAC) <sup>18</sup>                         | Psychiatric*        | 161,460     | 4.34    | <b>6.58x10<sup>-06</sup></b> | 2.1x10 <sup>-03</sup> | 2.5x10 <sup>-03</sup> | 0.1                 |
| Age of first birth (SSGAC) <sup>19</sup>                          | Reproduction        | 251,151     | -7.41   | <b>1.26x10<sup>-13</sup></b> | 3.2x10 <sup>-03</sup> | 3.1x10 <sup>-03</sup> | 0.2                 |
| Number of children ever born (SSGAC) <sup>19</sup>                | Reproduction        | 343,072     | 2.81    | 5.01x10 <sup>-03</sup>       | 4.6x10 <sup>-04</sup> | 4.5x10 <sup>-04</sup> | 1.0                 |
| Smoking age of onset (TAG) <sup>20</sup>                          | Smoking behaviour   | 24,114      | 1.17    | 2.43x10 <sup>-01</sup>       | 7.9x10 <sup>-05</sup> | 7.7x10 <sup>-05</sup> | 1x10 <sup>-03</sup> |
| life-time smoking (TAG) <sup>20</sup>                             | Smoking behaviour   | 74,035      | 4.01    | <b>6.08x10<sup>-05</sup></b> | 9.4x10 <sup>-04</sup> | 9.2x10 <sup>-04</sup> | 0.1                 |
| Current vs former smoker (TAG) <sup>20</sup>                      | Smoking behaviour   | 41,969      | -1.19   | 2.33x10 <sup>-01</sup>       | 8.3x10 <sup>-05</sup> | 8.1x10 <sup>-05</sup> | 1                   |
| Cigarettes per day (TAG) <sup>20</sup>                            | Smoking behaviour   | 68,028      | 1.75    | 8.01x10 <sup>-02</sup>       | 1.8x10 <sup>-04</sup> | 1.8x10 <sup>-04</sup> | 1x10 <sup>-03</sup> |

\* In PRS analyses of psychiatric disorders, individuals having a diagnosis of the respective psychiatric disorder being analysed (ADHD, schizophrenia, major depressive disorder and depressive symptoms) were excluded in the CUD target sample.

## References

- 1 Sherva, R. *et al.* Genome-wide Association Study of Cannabis Dependence Severity, Novel Risk Variants, and Shared Genetic Risks. *JAMA Psychiatry* **73**, 472-480, doi:10.1001/jamapsychiatry.2016.0036 (2016).
- 2 Agrawal, A. *et al.* Genome-wide association study identifies a novel locus for cannabis dependence. *Molecular psychiatry*, doi:10.1038/mp.2017.200 (2017).
- 3 Pasmán, J. A. *et al.* GWAS of lifetime cannabis use reveals new risk loci, genetic overlap with psychiatric traits, and a causal influence of schizophrenia. *Nature neuroscience* **21**, 1161-1170, doi:10.1038/s41593-018-0206-1 (2018).
- 4 Gamazon, E. R. *et al.* A gene-based association method for mapping traits using reference transcriptome data. *Nature genetics* **47**, 1091-1098, doi:10.1038/ng.3367 (2015).
- 5 Liu, M. *et al.* Association studies of up to 1.2 million individuals yield new insights into the genetic etiology of tobacco and alcohol use. *Nature genetics*, doi:10.1038/s41588-018-0307-5 (2019).
- 6 Zhu, Z. *et al.* Causal associations between risk factors and common diseases inferred from GWAS summary data. *Nature communications* **9**, 224, doi:10.1038/s41467-017-02317-2 (2018).
- 7 Lee, S. H., Goddard, M. E., Wray, N. R. & Visscher, P. M. A better coefficient of determination for genetic profile analysis. *Genet Epidemiol* **36**, 214-224, doi:10.1002/gepi.21614 (2012).
- 8 Davies, G. *et al.* Genome-wide association study of cognitive functions and educational attainment in UK Biobank (N=112 151). *Molecular psychiatry* **21**, 758-767, doi:10.1038/mp.2016.45 (2016).
- 9 Sniekers, S. *et al.* Genome-wide association meta-analysis of 78,308 individuals identifies new loci and genes influencing human intelligence. *Nature genetics* **49**, 1107-1112, doi:10.1038/ng.3869 (2017).
- 10 Okbay, A. *et al.* Genome-wide association study identifies 74 loci associated with educational attainment. *Nature* **533**, 539-542, doi:10.1038/nature17671 (2016).
- 11 Rietveld, C. A. *et al.* GWAS of 126,559 individuals identifies genetic variants associated with educational attainment. *Science* **340**, 1467-1471, doi:10.1126/science.1235488 (2013).
- 12 de Moor, M. H. *et al.* Meta-analysis of genome-wide association studies for personality. *Molecular psychiatry* **17**, 337-349, doi:10.1038/mp.2010.128 (2012).
- 13 Genetics of Personality, C. *et al.* Meta-analysis of Genome-wide Association Studies for Neuroticism, and the Polygenic Association With Major Depressive Disorder. *JAMA Psychiatry* **72**, 642-650, doi:10.1001/jamapsychiatry.2015.0554 (2015).
- 14 van den Berg, S. M. *et al.* Meta-analysis of Genome-Wide Association Studies for Extraversion: Findings from the Genetics of Personality Consortium. *Behav Genet* **46**, 170-182, doi:10.1007/s10519-015-9735-5 (2016).
- 15 Demontis, D. *et al.* Discovery Of The First Genome-Wide Significant Risk Loci For ADHD. *bioRxiv*, doi:10.1101/145581 (2017).
- 16 Schizophrenia Working Group of the Psychiatric Genomics, C. Biological insights from 108 schizophrenia-associated genetic loci. *Nature* **511**, 421-427, doi:10.1038/nature13595 (2014).
- 17 Major Depressive Disorder Working Group of the Psychiatric, G. C. *et al.* A mega-analysis of genome-wide association studies for major depressive disorder. *Molecular psychiatry* **18**, 497-511, doi:10.1038/mp.2012.21 (2013).
- 18 Okbay, A. *et al.* Genetic variants associated with subjective well-being, depressive symptoms, and neuroticism identified through genome-wide analyses. *Nature genetics* **48**, 624-633, doi:10.1038/ng.3552 (2016).

- 19 Barban, N. *et al.* Genome-wide analysis identifies 12 loci influencing human reproductive behavior. *Nature genetics* **48**, 1462-1472, doi:10.1038/ng.3698 (2016).
- 20 Tobacco & Genetics, C. Genome-wide meta-analyses identify multiple loci associated with smoking behavior. *Nature genetics* **42**, 441-447, doi:10.1038/ng.571 (2010).
